# Supplementary material
Source: publisher site journal article supplement (https://www.spandidos-publications.com/3337/downloadSupplementary)

Figure S1. Screening of CD44<sup>+</sup>CD117<sup>+</sup> cells and detection of Notch1 expression. (A) CD44<sup>+</sup> cells in the subclones were determined via flow cytometry. (B) CD44<sup>+</sup>CD117<sup>+</sup> cells in the subclones were determined via flow cytometry. (C) Expression level of Notch1 was measured via reverse transcription-quantitative PCR. (D) Protein expression level of Notch1 was determined via western blotting. \*P<0.05, \*\*P<0.01 and \*\*\*P<0.001 vs. siNC. NC, negative control; si, small interfering RNA; Notch1, notch receptor 1.

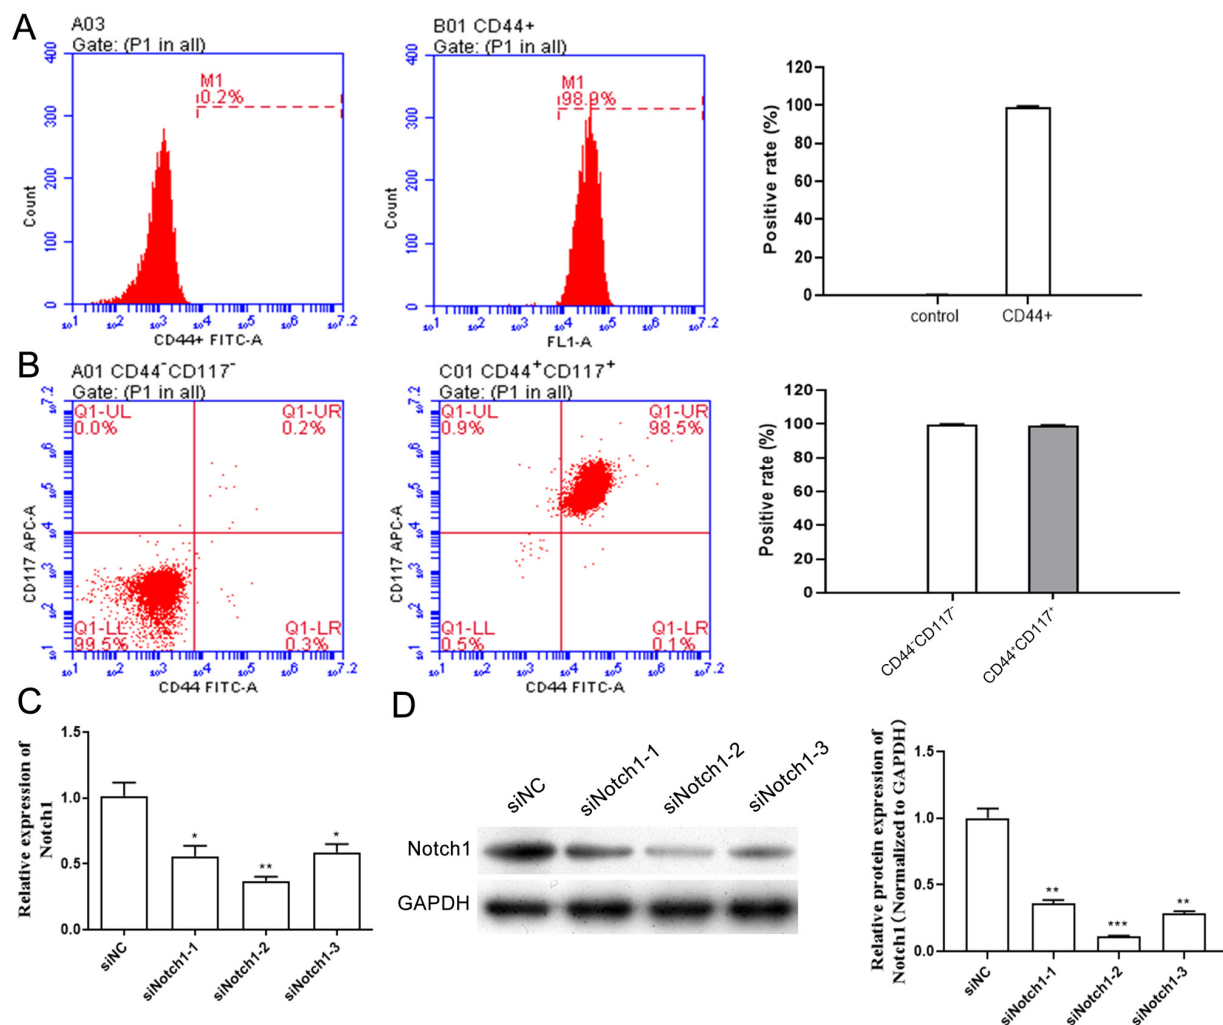

Supplement: Supplementary file 1 [file downloadSupplementary]
